# Supplementary material for: Release of Anti-Inflammatory Palmitoleic Acid and Its Positional Isomers by Mouse Peritoneal Macrophages
Source: PubMed Central journal article supplement (PMC7694668; doi:10.3390/biomedicines8110480), 2020-11-06
Supplement: biomedicines-08-00480-s001.pdf [file biomedicines-08-00480-s001.pdf]

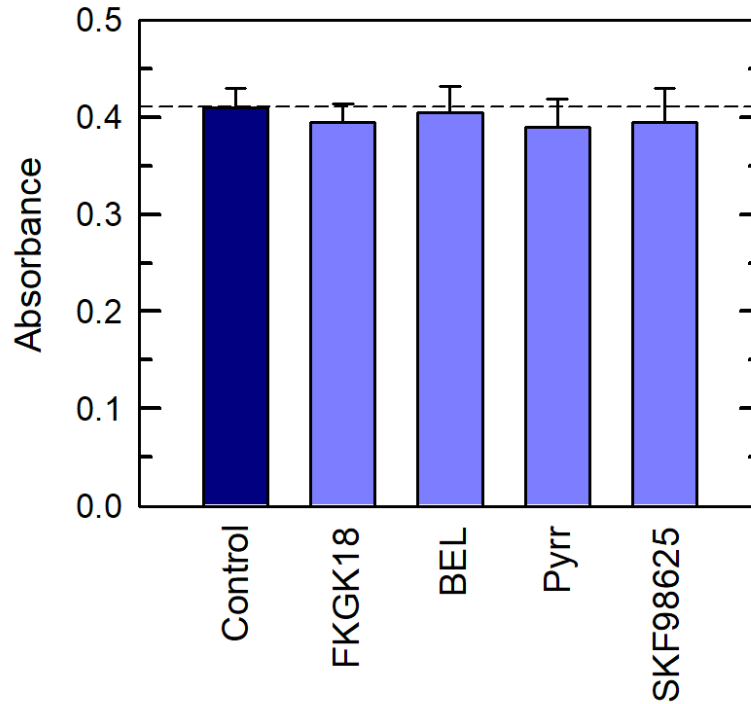

**Figure S1.** PLA<sub>2</sub> inhibitors do not affect macrophage viability. The cells were either untreated (Control) or treated with the following inhibitors for 1 h: 10  $\mu$ M FKGGK18, 5  $\mu$ M bromoenol lactone (BEL), 2  $\mu$ M pyrrophenone (pyrr), or 10  $\mu$ M SKF98625. Afterward, cell viability was determined using the CellTiter 96® AQueous One Solution Cell Proliferation Assay kit (Promega, Madison, WI, USA), following the manufacturer's instructions, and absorbance was read at 490 nm. Results are shown as means  $\pm$  S.E.M. (n=6).
